# Supplementary material
Source: PubMed Central journal article supplement (PMC10220108)
Supplement: 40264_2023_1306_MOESM1_ESM.pdf [file 40264_2023_1306_MOESM1_ESM.pdf]

**Identifying safety subgroups at risk: Assessing the agreement between statistical alerting and patient subgroup risk**

**Journal:** *Drug Safety*

**Authors:** Olivia Mahaux<sup>1</sup>, Greg Powell<sup>2</sup>, François Haguinet<sup>1</sup>, Paulina Sobczak<sup>3</sup>, Namrata Saini<sup>4</sup>, Allen Barry<sup>5</sup>, Amira Mustafa<sup>5</sup>, Andrew Bate<sup>6,7</sup>

<sup>1</sup> Safety Innovation and Analytics, GSK, Wavre, Belgium; <sup>2</sup>Safety Innovation and Analytics, GSK, Durham, NC, USA; <sup>3</sup>Safety Evaluation and Risk Management, GSK, Warsaw, Poland; <sup>4</sup>Safety Evaluation and Risk Management, GSK, Bangalore, India; <sup>5</sup>University of North Carolina, North Carolina, USA; <sup>6</sup>Safety Innovation and Analytics, GSK, London, United Kingdom; <sup>7</sup>London School of Hygiene and Tropical Medicine, University of London, London, UK.

**Corresponding author:** Olivia Mahaux, [olivia.x.mahaux@gsk.com](mailto:olivia.x.mahaux@gsk.com)

## Supplementary Information

**Supplementary Table 1.** PRAC subgroup examples (n=27) and their mapping to drug, event and subgroup information from FAERS

| PRAC Minutes   | Drug mentioned in PRAC minutes                | FAERS active moieties                                                                  | Event mentioned in PRAC minutes | FAERS MedDRA PT                                                                                                                       | Subgroup mentioned in PRAC minutes | Subgroup according to Sandberg et al. [1]                                         |
|----------------|-----------------------------------------------|----------------------------------------------------------------------------------------|---------------------------------|---------------------------------------------------------------------------------------------------------------------------------------|------------------------------------|-----------------------------------------------------------------------------------|
| 9–12 July 2018 | Amitriptyline (NAP); dosulepin (NAP)          | AMITRIPTYLINE<br>DOTHIEPIN                                                             | Dementia                        | Dementia<br>Mixed dementia<br>Dementia Alzheimer's type                                                                               | Elderly                            | 65–74; 75+ years                                                                  |
| 9–12 July 2018 | Oxybutynin - KENTERA (CAP), NAP               | OXYBUTYNIN                                                                             | Dementia                        | Dementia<br>Dementia Alzheimer's type                                                                                                 | Elderly                            | 65–74; 75+ years                                                                  |
| 9–12 July 2018 | Paroxetine (NAP)                              | PAROXETINE                                                                             | Dementia                        | Dementia<br>Vascular dementia<br>Senile dementia<br>Frontotemporal dementia<br>Dementia Alzheimer's type<br>Dementia with Lewy bodies | Elderly                            | 65–74; 75+ years                                                                  |
| 9–12 July 2018 | Procyclidine (NAP)                            | PROCYCLIDINE                                                                           | Dementia                        | Dementia                                                                                                                              | Elderly                            | 65–74 years                                                                       |
| 9–12 July 2018 | Tolterodine (NAP)                             | TOLTERODINE                                                                            | Dementia                        | Dementia<br>Senile dementia<br>Dementia Alzheimer's type                                                                              | Elderly                            | 65–74; 75+ years                                                                  |
| 9–12 July 2018 | Sildenafil                                    | SILDENAFIL                                                                             | Mortality                       | Death<br>Sudden death<br>Death neonatal                                                                                               | Neonates                           | 0–27 days                                                                         |
| 11–14 Feb 2019 | Olanzapine                                    | OLANZAPINE                                                                             | Gestational diabetes            | Gestational diabetes                                                                                                                  | Pregnant <sup>a</sup>              | Female;<br>15–44 years.                                                           |
| 11–14 Jan 2016 | Oxybutynin                                    | OXYBUTYNIN                                                                             | Psychiatric disorders           | Drug abuse                                                                                                                            | Paediatric                         | 12–17 years                                                                       |
| 12–15 Mar 2019 | Sodium–glucose transport protein 2 inhibitors | ERTUGLIFLOZIN<br>ERTUGLIFLOZIN\SITAGLIPTIN<br>ERTUGLIFLOZIN\METFORMIN<br>CANAGLIFLOZIN | Diabetic ketoacidosis           | Diabetic ketoacidosis<br>hyperglycaemic coma                                                                                          | Adults, surgical patients          | 18–44; 45–64 years;<br>Indication HLGTS:<br>Bone and joint therapeutic procedures |

|                      |                             |                                                                                                                                                                                                                                                                                             |                          |                                                                                                                                                 |                                                |                                                                                                                                                                                                                                                                                                                                                                                                                                                                         |
|----------------------|-----------------------------|---------------------------------------------------------------------------------------------------------------------------------------------------------------------------------------------------------------------------------------------------------------------------------------------|--------------------------|-------------------------------------------------------------------------------------------------------------------------------------------------|------------------------------------------------|-------------------------------------------------------------------------------------------------------------------------------------------------------------------------------------------------------------------------------------------------------------------------------------------------------------------------------------------------------------------------------------------------------------------------------------------------------------------------|
|                      |                             | CANAGLIFLOZIN\METFORMIN<br>CANAGLIFLOZIN\TENELIGLIPTIN<br>DAPAGLIFLOZIN PROPANEDIOL<br>DAPAGLIFLOZIN<br>DAPAGLIFLOZIN<br>PROPANEDIOL\METFORMIN<br>DAPAGLIFLOZIN\SAXAGLIPTIN<br>EMPAGLIFLOZIN<br>EMPAGLIFLOZIN\METFORMIN<br>EMPAGLIFLOZIN\LINAGLIPTIN<br>EMPAGLIFLOZIN\LINAGLIPTIN\METFORMIN |                          | Diabetic ketoacidosis<br>Euglycemic diabetic ketoacidosis                                                                                       |                                                | Cardiac therapeutic procedures<br>Endocrine gland therapeutic procedures<br>Gastrointestinal therapeutic procedures<br>Haematological and lymphoid tissue therapeutic procedures<br>Head and neck therapeutic procedures<br>Nervous system, skull and spine therapeutic procedures<br>Obstetric and gynaecological therapeutic procedures<br>Soft tissue therapeutic procedures<br>Therapeutic procedures and supportive care<br>NEC<br>Vascular therapeutic procedures |
| 13–16<br>May<br>2019 | Finasteride and dutasteride | FINASTERIDE<br>DUTASTERIDE<br>DUTASTERIDE\TAMSULOSIN                                                                                                                                                                                                                                        | Type 2 diabetes mellitus | Type 2 diabetes mellitus<br>Diabetes mellitus inadequate control<br>Insulin-requiring type 2 diabetes mellitus<br>Diabetes mellitus             | Men, benign prostatic hyperplasia <sup>b</sup> | Male;<br>Indication HLGT:<br>Prostatic disorders (excl. infections and inflammations)                                                                                                                                                                                                                                                                                                                                                                                   |
| 14–17<br>Jan 2019    | Acetylsalicylic acid (NAP)  | ASPIRIN<br>ANHYDROUS CITRIC ACID\ASPIRIN\SODIUM BICARBONATE                                                                                                                                                                                                                                 | Mortality                | Accidental death<br>Agonal death struggle<br>Brain death<br>Cardiac death<br>Completed suicide<br>Death<br>Sudden cardiac death<br>Sudden death | Elderly, cancer patients                       | 65–74; 75+ years;<br>Indication HLGTs:<br>Breast neoplasms malignant and unspecified (incl. nipple)                                                                                                                                                                                                                                                                                                                                                                     |

Suspected suicide

Endocrine neoplasms  
malignant and  
unspecified  
Gastrointestinal  
neoplasms malignant  
and unspecified  
Haematopoietic  
neoplasms (excl.  
leukaemias and  
lymphomas)  
Hepatobiliary  
neoplasms malignant  
and unspecified  
Leukaemias  
Lymphomas NEC  
Lymphomas non-  
Hodgkin's B-cell  
Metastases  
Miscellaneous and site  
unspecified neoplasms  
malignant and  
unspecified  
Neoplasm-related  
morbidity  
Plasma cell neoplasms  
Renal and urinary tract  
neoplasms malignant  
and unspecified  
Reproductive  
neoplasms female  
malignant and  
unspecified  
Reproductive  
neoplasms male  
malignant and  
unspecified  
Respiratory and  
mediastinal neoplasms

|                      |                                                                                                                                                                                                |                                                                                                                                                                                                                                                                                                                                                                                                         |                          |                                                                                                                                                                                                                                                                                        |                                                                                                              |                                                                                                                                                             |
|----------------------|------------------------------------------------------------------------------------------------------------------------------------------------------------------------------------------------|---------------------------------------------------------------------------------------------------------------------------------------------------------------------------------------------------------------------------------------------------------------------------------------------------------------------------------------------------------------------------------------------------------|--------------------------|----------------------------------------------------------------------------------------------------------------------------------------------------------------------------------------------------------------------------------------------------------------------------------------|--------------------------------------------------------------------------------------------------------------|-------------------------------------------------------------------------------------------------------------------------------------------------------------|
|                      |                                                                                                                                                                                                |                                                                                                                                                                                                                                                                                                                                                                                                         |                          |                                                                                                                                                                                                                                                                                        |                                                                                                              | malignant and unspecified<br>Skin neoplasms<br>malignant and unspecified                                                                                    |
| 14–17<br>May<br>2018 | Daclatasvir,<br>dasabuvir, elbasvir,<br>grazoprevir,<br>glecaprevir,<br>pibrentasvir,<br>ledipasvir,<br>ombitasvir,<br>paritaprevir, ritonavir,<br>sofosbuvir,<br>velpatasvir,<br>voxilaprevir | DACLATASVIR<br>DASABUVIR<br>DASABUVIR\OMBITASVIR\PARITAPR<br>EVIR\ RITONAVIR<br>GLECAPREVIR\PIBRENTASVIR<br>LEDIPASVIR\SOFOBSUVIR<br>OMBITASVIR<br>OMBITASVIR\PARITAPREVIR\RITONA<br>VIR<br>PARITAPREVIR<br>ATAZANAVIR\RITONAVIR<br>LOPINAVIR\RITONAVIR<br>RITONAVIR<br>RITONAVIR\TIPRANAVIR<br>SOFOBSUVIR<br>SOFOBSUVIR\VELPATASVIR<br>SOFOBSUVIR\VELPATASVIR\<br>VOXILAPREVIR<br>ELBASVIR\GRAZOPREVIR | Dysglycaemia             | Blood glucose abnormal<br>Blood glucose increased<br>Blood glucose decreased<br>Blood glucose fluctuation<br>Hypoglycaemia<br>Hypoglycaemic seizure<br>Hypoglycaemic<br>unconsciousness<br>Shock hypoglycaemic<br>Hyperglycaemia<br>Hyperglycaemic hyperosmolar<br>nonketotic syndrome | Adults, type 2<br>diabetes mellitus                                                                          | 18–44; 45–64 years;<br>Indication HLGT:<br>Glucose metabolism<br>disorders (incl. diabetes<br>mellitus)                                                     |
| 24–27<br>Oct 2016    | Riociguat                                                                                                                                                                                      | RIOCIGUAT                                                                                                                                                                                                                                                                                                                                                                                               | Mortality                | Death<br>Sudden death<br>Sudden cardiac death                                                                                                                                                                                                                                          | Adults, pulmonary<br>hypertension<br>associated with<br>idiopathic<br>interstitial<br>pneumonia <sup>†</sup> | 18–44; 45–64 years;<br>Indication HLGT:<br>Pulmonary vascular<br>disorders;<br>Lower respiratory track<br>disorders (excl.<br>obstruction and<br>infection) |
| 25–29<br>Sep 2017    | Desloratadine,<br>loratadine                                                                                                                                                                   | LORATADINE<br>DESLORATADINE                                                                                                                                                                                                                                                                                                                                                                             | Weight<br>increase       | Weight increased<br>Abnormal weight gain                                                                                                                                                                                                                                               | Children                                                                                                     | 2–11 years                                                                                                                                                  |
| 26–29<br>Sep 2016    | Metronidazole                                                                                                                                                                                  | BISMUTH\METRONIDAZOLE\TETRAC<br>YCLINE                                                                                                                                                                                                                                                                                                                                                                  | Neurological<br>toxicity | Toxic encephalopathy                                                                                                                                                                                                                                                                   | Cockayne<br>syndrome                                                                                         | Indication HLGT:<br>Neurological disorders<br>congenital                                                                                                    |

|                      |                          |                                                   |                      |                                                                                                                                                                                                                                                                                                                                                                                                                                                                                                                                                                                                                                                                                                                                                                                                                                                                                                                                                              |                                                                    |                                                                                                                              |
|----------------------|--------------------------|---------------------------------------------------|----------------------|--------------------------------------------------------------------------------------------------------------------------------------------------------------------------------------------------------------------------------------------------------------------------------------------------------------------------------------------------------------------------------------------------------------------------------------------------------------------------------------------------------------------------------------------------------------------------------------------------------------------------------------------------------------------------------------------------------------------------------------------------------------------------------------------------------------------------------------------------------------------------------------------------------------------------------------------------------------|--------------------------------------------------------------------|------------------------------------------------------------------------------------------------------------------------------|
| 28 Nov to 1 Dec 2016 | Methylphenidate          | DEXMETHYLPHENIDATE<br>METHYLPHENIDATE             | Priapism             | Priapism<br>Erection increased<br>Painful erection                                                                                                                                                                                                                                                                                                                                                                                                                                                                                                                                                                                                                                                                                                                                                                                                                                                                                                           | Men                                                                | Male                                                                                                                         |
| 29–31 Oct 2018       | Xarelto (class of DOACs) | APIXABAN<br>DABIGATRAN<br>EDOXABAN<br>RIVAROXABAN | Recurrent thrombosis | Renal thrombosis<br>Aortic thrombosis<br>Arterial thrombosis<br>Atrial thrombosis<br>Axillary vein thrombosis<br>Basilar artery thrombosis<br>Brain stem thrombosis<br>Cardiac ventricular thrombosis<br>Carotid artery thrombosis<br>Catheter site thrombosis<br>Cerebral artery thrombosis<br>Cerebral thrombosis<br>Cerebral venous sinus thrombosis<br>Cerebral venous thrombosis<br>Coronary artery thrombosis<br>Deep vein thrombosis<br>Deep vein thrombosis postoperative<br>Device-related thrombosis<br>Graft thrombosis<br>Hepatic vein thrombosis<br>Injection site thrombosis<br>Jugular vein thrombosis<br>Medical device site thrombosis<br>Mesenteric artery thrombosis<br>Mesenteric vein thrombosis<br>Ophthalmic artery thrombosis<br>Ophthalmic vein thrombosis<br>Ovarian vein thrombosis<br>Pelvic venous thrombosis<br>Peripheral artery thrombosis<br>Portal vein thrombosis<br>Post thrombotic syndrome<br>Postoperative thrombosis | Adults, antiphospholipid syndrome and with a history of thrombosis | 18–44; 45–64 years; Indication HLGT: Coagulopathies and bleeding diatheses (excl. thrombocytopenic); Embolism and thrombosis |

---

Prosthetic cardiac valve  
thrombosis  
Pulmonary artery thrombosis  
Pulmonary thrombosis  
Pulmonary venous thrombosis  
Renal artery thrombosis  
Renal vascular thrombosis  
Renal vein thrombosis  
Retinal artery thrombosis  
Retinal vascular thrombosis  
Retinal vein thrombosis  
Shunt thrombosis  
Splenic thrombosis  
Splenic vein thrombosis  
Subclavian artery thrombosis  
Subclavian vein thrombosis  
Superior sagittal sinus  
thrombosis  
Thrombosis  
Thrombosis in device  
Thrombosis mesenteric vessel  
Thrombosis prophylaxis  
Thrombotic cerebral infarction  
Thrombotic microangiopathy  
Thrombotic stroke  
Thrombotic thrombocytopenic  
purpura  
Transverse sinus thrombosis  
Tumour thrombosis  
Vascular graft thrombosis  
Vascular stent thrombosis  
Vena cava thrombosis  
Venous thrombosis  
Venous thrombosis in  
pregnancy  
Venous thrombosis limb  
Vertebral artery thrombosis

---

|                      |                                                                                                                                                                                                                                                                                                                                                                                                               |                                                                                                                                                                                                                                                                                                                                                                                                                                                                                                                                                             |                                                |                                                                                                                                                                                                                                                                                                                                                                                                            |                                                           |                                                                                                            |
|----------------------|---------------------------------------------------------------------------------------------------------------------------------------------------------------------------------------------------------------------------------------------------------------------------------------------------------------------------------------------------------------------------------------------------------------|-------------------------------------------------------------------------------------------------------------------------------------------------------------------------------------------------------------------------------------------------------------------------------------------------------------------------------------------------------------------------------------------------------------------------------------------------------------------------------------------------------------------------------------------------------------|------------------------------------------------|------------------------------------------------------------------------------------------------------------------------------------------------------------------------------------------------------------------------------------------------------------------------------------------------------------------------------------------------------------------------------------------------------------|-----------------------------------------------------------|------------------------------------------------------------------------------------------------------------|
| 29 Aug to 1 Sep 2017 | Azithromycin                                                                                                                                                                                                                                                                                                                                                                                                  | AZITHROMYCIN                                                                                                                                                                                                                                                                                                                                                                                                                                                                                                                                                | Mortality                                      | Death<br>Cardiac death<br>Sudden death<br>Sudden cardiac death<br>Brain death<br>Death neonatal<br>Completed suicide                                                                                                                                                                                                                                                                                       | Adults,<br>haematopoietic<br>stem cell<br>transplantation | 18–44; 45–64 years;<br>Indication HLGT:<br>Haematological and<br>lymphoid tissue<br>therapeutic procedures |
| 29 Aug to 1 Sep 2017 | Azithromycin                                                                                                                                                                                                                                                                                                                                                                                                  | AZITHROMYCIN                                                                                                                                                                                                                                                                                                                                                                                                                                                                                                                                                | Relapses of<br>haematologica<br>l malignancies | T-cell lymphoma recurrent<br>Leukaemia recurrent                                                                                                                                                                                                                                                                                                                                                           | Adults,<br>haematopoietic<br>stem cell<br>transplantation | 18–44; 45–64 years                                                                                         |
| 30 Nov to 3 Dec 2015 | HRT (conjugated oestrogens, bazedoxifene, Bazedoxifene SENSHIO (CAP) CONBRIZA, bazedoxifene, oestrogens conjugated – DUAVIVE (CAP); raloxifene – EVISTA (CAP), OPTRUMA (CAP); NAP Chlorotrianisene; conjugated oestrogens; dienestrol; diethylstilbestrol; oestradiol; Oestriol; oestrogen; estrone; ethinyloestradiol; lasofoxifene; methallenestril; Moxestrol; ormeloxifene; promestriene; tibolone – NAP) | BAZEDOXIFENE\OESTROGENS, CONJUGATED<br>DIETHYLSTILBESTROL<br>DROSPIRENONE\OESTRADIOL<br>DROSPIRENONE\ETHINYL<br>OESTRADIOL<br>OESTRADIOL<br>OESTRADIOL\NORETHINDRONE<br>OESTRADIOL\NORGESTIMATE<br>OESTRIOL<br>OESTROGENS, CONJUGATED<br>OESTROGENS, CONJUGATED<br>SYNTHETIC A<br>OESTROGENS,<br>CONJUGATED\MEDROXYPROGESTERONE<br>ETHINYL OESTRADIOL<br>ETHINYL<br>OESTRADIOL\NORGESTIMATE<br>RALOXIFENE<br>TIBOLONE<br>DESOGESTREL\ETHINYL<br>OESTRADIOL<br>DIENOGEST\OESTRADIOL<br>DIENOGEST\ETHINYL OESTRADIOL<br>OESTROGENS, ESTERIFIED<br>OESTROGENS, | Ovarian cancer                                 | Malignant ovarian cyst<br>Ovarian cancer<br>Ovarian cancer metastatic<br>Ovarian cancer recurrent<br>Ovarian cancer stage III<br>Ovarian clear cell carcinoma<br>Ovarian epithelial cancer<br>Ovarian epithelial cancer metastatic<br>Ovarian epithelial cancer stage III<br>Ovarian germ cell tumour<br>Ovarian granulosa-theca cell tumour<br>Ovarian low malignant potential tumour<br>Ovarian neoplasm | Women,<br>postmenopausal                                  | Female; 45–64; 65–74;<br>75+ years                                                                         |



ESTERIFIED\METHYLTESTOSTERONE

|                                     |                                                                                                                                                                                                                                                                                  |                                                                                                                                                                                                                                                                                                                                                                                                                                                                                                                                                                                                                                                                                                                                                                                                                                                                      |                      |                                                                                                                                                                                                                                                                                                                                                                                                                                                                                                                                                                                                                                                                                                                                                                                                                                                                                                                                                                     |                                  |                                            |
|-------------------------------------|----------------------------------------------------------------------------------------------------------------------------------------------------------------------------------------------------------------------------------------------------------------------------------|----------------------------------------------------------------------------------------------------------------------------------------------------------------------------------------------------------------------------------------------------------------------------------------------------------------------------------------------------------------------------------------------------------------------------------------------------------------------------------------------------------------------------------------------------------------------------------------------------------------------------------------------------------------------------------------------------------------------------------------------------------------------------------------------------------------------------------------------------------------------|----------------------|---------------------------------------------------------------------------------------------------------------------------------------------------------------------------------------------------------------------------------------------------------------------------------------------------------------------------------------------------------------------------------------------------------------------------------------------------------------------------------------------------------------------------------------------------------------------------------------------------------------------------------------------------------------------------------------------------------------------------------------------------------------------------------------------------------------------------------------------------------------------------------------------------------------------------------------------------------------------|----------------------------------|--------------------------------------------|
| <p>30 Sep to<br/>3 Oct<br/>2019</p> | <p>HRT (conjugated oestrogens, bazedoxifene, bazedoxifene, oestrogens conjugated – DUAVIVE (CAP); diethylstilbestrol (NAP); oestradiol (NAP); oestradiol, norethisterone (NAP); oestriol (NAP); oestrone (NAP); ethinyloestradiol (NAP); promestriene (NAP); tibolone (NAP))</p> | <p>BAZEDOXIFENE<br/>BAZEDOXIFENE\OESTROGENS,<br/>CONJUGATED<br/>DIENESTROL<br/>DIETHYLSTILBESTROL<br/>DROSPIRENONE\OESTRADIOL<br/>DROSPIRENONE\ETHINYL<br/>OESTRADIOL<br/>DYDROGESTERONE\OESTRADIOL<br/>OESTRADIOL<br/>OESTRADIOL\TESTOSTERONE<br/>OESTRADIOL\LEVONORGESTREL<br/>OESTRADIOL\NORETHINDRONE<br/>OESTRADIOL\ESTRIOL\ESTRONE<br/>OESTRADIOL\NORETHISTERONE<br/>OESTRADIOL\NORGESTIMATE<br/>OESTRADIOL\PROGESTERONE<br/>OESTRIOL<br/>OESTROGENS, CONJUGATED<br/>OESTROGENS, CONJUGATED<br/>SYNTHETIC A<br/>OESTROGENS,<br/>CONJUGATED\MEDROXYPROGESTER<br/>ONE<br/>OESTROGENS,<br/>CONJUGATED\METHYLTESTOSTERON<br/>E<br/>OESTROGENS\PROGESTERONE<br/>OESTROGENS\PROGESTERONE\TESTO<br/>STERONE<br/>OESTROGENS\TESTOSTERONE<br/>ESTRONE<br/>ETHINYL OESTRADIOL<br/>ETHINYL<br/>OESTRADIOL\FERROUS\NORETHINDR<br/>ONE<br/>ETHINYL OESTRADIOL\GESTODENE</p> | <p>Breast cancer</p> | <p>Breast cancer<br/>Breast cancer female<br/>Breast cancer in situ<br/>Breast cancer male<br/>Breast cancer metastatic<br/>Breast cancer recurrent<br/>Breast cancer stage I<br/>Breast cancer stage II<br/>Breast cancer stage III<br/>Breast cancer stage IV<br/>Breast implant-associated<br/>anaplastic large cell lymphoma<br/>Breast neoplasm<br/>Breast sarcoma<br/>HER2-positive breast cancer<br/>Hormone receptor-positive<br/>breast cancer<br/>Inflammatory carcinoma of<br/>breast stage IV<br/>Inflammatory carcinoma of the<br/>breast<br/>Intraductal proliferative breast<br/>lesion<br/>Invasive breast carcinoma<br/>Invasive ductal breast<br/>carcinoma<br/>Invasive lobular breast<br/>carcinoma<br/>Invasive papillary breast<br/>carcinoma<br/>Lobular breast carcinoma in situ<br/>Malignant nipple neoplasm<br/>female<br/>Metastases to breast<br/>Paget's disease of nipple<br/>Phyllodes tumour<br/>Triple negative breast cancer</p> | <p>Women,<br/>postmenopausal</p> | <p>Female; 45–64; 65–74;<br/>75+ years</p> |
|-------------------------------------|----------------------------------------------------------------------------------------------------------------------------------------------------------------------------------------------------------------------------------------------------------------------------------|----------------------------------------------------------------------------------------------------------------------------------------------------------------------------------------------------------------------------------------------------------------------------------------------------------------------------------------------------------------------------------------------------------------------------------------------------------------------------------------------------------------------------------------------------------------------------------------------------------------------------------------------------------------------------------------------------------------------------------------------------------------------------------------------------------------------------------------------------------------------|----------------------|---------------------------------------------------------------------------------------------------------------------------------------------------------------------------------------------------------------------------------------------------------------------------------------------------------------------------------------------------------------------------------------------------------------------------------------------------------------------------------------------------------------------------------------------------------------------------------------------------------------------------------------------------------------------------------------------------------------------------------------------------------------------------------------------------------------------------------------------------------------------------------------------------------------------------------------------------------------------|----------------------------------|--------------------------------------------|

|                 |                           |                                                                                                                                                                                                                                                                                                                                                                                                |          |                                                                                                                                                                                                                                                                                                                                                                                                                                                                                                        |                                         |                                                                                           |
|-----------------|---------------------------|------------------------------------------------------------------------------------------------------------------------------------------------------------------------------------------------------------------------------------------------------------------------------------------------------------------------------------------------------------------------------------------------|----------|--------------------------------------------------------------------------------------------------------------------------------------------------------------------------------------------------------------------------------------------------------------------------------------------------------------------------------------------------------------------------------------------------------------------------------------------------------------------------------------------------------|-----------------------------------------|-------------------------------------------------------------------------------------------|
|                 |                           | ETHINYL<br>OESTRADIOL\MESTRANOL\NORETHIN<br>DRONE<br>ETHINYL<br>OESTRADIOL\NORGESTIMATE<br>OSPEMIFENE<br>RALOXIFENE<br>TIBOLONE<br>CYPROTERONE\ETHINYL<br>OESTRADIOL<br>DESOGESTREL\ETHINYL<br>OESTRADIOL<br>DIENOGEST\OESTRADIOL<br>DIENOGEST\ETHINYL OESTRADIOL<br>DROSPIRENONE\ETHINYL<br>OESTRADIOL\LEVOMEFOLATE<br>OESTROGENS, ESTERIFIED<br>OESTROGENS,<br>ESTERIFIED\METHYLTESTOSTERONE |          | Triple positive breast cancer                                                                                                                                                                                                                                                                                                                                                                                                                                                                          |                                         |                                                                                           |
| 1–4 Oct<br>2018 | Adalimumab,<br>infliximab | ADALIMUMAB<br>ADALIMUMAB-ATTO<br>INFLIXIMAB<br>INFLIXIMAB-ABDA<br>INFLIXIMAB-DYYB                                                                                                                                                                                                                                                                                                              | Lymphoma | Adenolymphoma<br>Adult T-cell<br>lymphoma/leukaemia<br>Anaplastic large cell lymphoma<br>T- and null-cell types<br>Anaplastic large cell lymphoma<br>T- and null-cell types stage IV<br>Anaplastic large-cell lymphoma<br>Angiocentric lymphoma<br>Angioimmunoblastic T-cell<br>lymphoma<br>Angioimmunoblastic T-cell<br>lymphoma refractory<br>Angioimmunoblastic T-cell<br>lymphoma stage III<br>B-cell lymphoma<br>B-cell lymphoma recurrent<br>B-cell lymphoma stage I<br>B-cell lymphoma stage II | Adult,<br>inflammatory<br>bowel disease | 18–44; 45–64 years;<br>Indication HLG:G<br>Gastrointestinal<br>inflammatory<br>conditions |

---

B-cell lymphoma stage III  
B-cell lymphoma stage IV  
B-cell small lymphocytic  
lymphoma  
B-cell small lymphocytic  
lymphoma stage I  
B-cell small lymphocytic  
lymphoma stage III  
B-cell unclassifiable lymphoma  
high grade  
B-cell unclassifiable lymphoma  
low grade  
Burkitt's lymphoma  
Burkitt's lymphoma stage IV  
Central nervous system  
lymphoma  
Cutaneous lymphoma  
Cutaneous T-cell lymphoma  
Cutaneous T-cell lymphoma  
stage I  
Cutaneous T-cell lymphoma  
stage II  
Cutaneous T-cell lymphoma  
stage III  
Cutaneous T-cell lymphoma  
stage IV  
Diffuse large B-cell lymphoma  
Diffuse large B-cell lymphoma  
recurrent  
Diffuse large B-cell lymphoma  
stage I  
Diffuse large B-cell lymphoma  
stage II  
Diffuse large B-cell lymphoma  
stage III  
Diffuse large B-cell lymphoma  
stage IV  
Disseminated large cell  
lymphoma

---

---

Enteropathy-associated T-cell lymphoma  
Epstein-Barr virus associated lymphoma  
Extranodal marginal zone B-cell lymphoma (MALT type)  
Follicle centre lymphoma, follicular grade I, II, III  
Follicle centre lymphoma, follicular grade I, II, III recurrent  
Follicle centre lymphoma, follicular grade I, II, III stage I  
Follicle centre lymphoma, follicular grade I, II, III stage III  
Follicle centre lymphoma, follicular grade I, II, III stage IV  
Gastrointestinal lymphoma  
Hepatosplenic T-cell lymphoma  
High grade B-cell lymphoma  
Burkitt-like lymphoma  
High-grade B-cell lymphoma  
Hodgkin's disease lymphocyte depletion type stage III  
Hodgkin's disease lymphocyte depletion type stage IV  
Hodgkin's disease lymphocyte predominance stage I site unspecified  
Hodgkin's disease lymphocyte predominance stage II site unspecified  
Hodgkin's disease lymphocyte predominance type stage IV  
Hodgkin's disease lymphocyte predominance type stage unspecified  
Lymphocytic lymphoma  
Lymphoma

---

---

Malignant lymphoma  
unclassifiable low grade  
Mantle cell lymphoma  
Mantle cell lymphoma stage IV  
Marginal zone lymphoma  
Metastatic lymphoma  
Natural killer cell lymphoblastic  
lymphoma  
Nodal marginal zone B-cell  
lymphoma  
Nodal marginal zone B-cell  
lymphoma stage II  
Non-Hodgkin's lymphoma  
Non-Hodgkin's lymphoma stage  
II  
Non-Hodgkin's lymphoma stage  
III  
Non-Hodgkin's lymphoma stage  
IV  
Non-Hodgkin's lymphoma  
unspecified histology  
aggressive  
Non-Hodgkin's lymphoma  
unspecified histology indolent  
Non-Hodgkin's lymphoma  
unspecified histology indolent  
stage IV  
Ocular lymphoma  
Papillary cystadenoma  
lymphomatosum  
Peripheral T-cell lymphoma  
unspecified  
Peripheral T-cell lymphoma  
unspecified stage IV  
Plasmablastic lymphoma  
Precursor B-lymphoblastic  
lymphoma  
Precursor T-lymphoblastic  
lymphoma/leukaemia

---

|               |                     |                                                                                                                                                 |                                   |                                                                                                                                                                                                                                                                                                                                                                                                                                                                      |                                                     |                                                                          |  |
|---------------|---------------------|-------------------------------------------------------------------------------------------------------------------------------------------------|-----------------------------------|----------------------------------------------------------------------------------------------------------------------------------------------------------------------------------------------------------------------------------------------------------------------------------------------------------------------------------------------------------------------------------------------------------------------------------------------------------------------|-----------------------------------------------------|--------------------------------------------------------------------------|--|
|               |                     |                                                                                                                                                 |                                   | Precursor T-lymphoblastic lymphoma/leukaemia stage III<br>Precursor T-lymphoblastic lymphoma/leukaemia stage IV<br>Primary breast lymphoma<br>Primary effusion lymphoma<br>Primary mediastinal large B-cell lymphoma<br>Primary mediastinal large B-cell lymphoma recurrent<br>Splenic marginal zone lymphoma<br>T-cell lymphoma<br>T-cell lymphoma recurrent<br>T-cell lymphoma refractory<br>T-cell lymphoma stage IV<br>T-cell unclassifiable lymphoma high grade |                                                     |                                                                          |  |
| 3–6 Apr 2017  | Selexipag           | SELEXIPAG                                                                                                                                       | Fatality                          | Death<br>Sudden death<br>Sudden cardiac death<br>Brain death<br>Completed suicide<br>Maternal death during childbirth                                                                                                                                                                                                                                                                                                                                                | Adult, pulmonary arterial hypertension <sup>b</sup> | 18–44; 45–64 years;<br>Indication HLG T:<br>Pulmonary vascular disorders |  |
| 4–7 May 2015  | Mitotane            | MITOTANE                                                                                                                                        | Development of ovarian macrocysts | Haemorrhagic ovarian cyst<br>Ovarian cyst<br>Ovarian cyst ruptured<br>Ovarian cyst torsion                                                                                                                                                                                                                                                                                                                                                                           | Women                                               | Female                                                                   |  |
| 4–7 May 2015  | Sildenafil          | SILDENAFIL                                                                                                                                      | Pulmonary haemorrhage             | Pulmonary alveolar haemorrhage<br>Pulmonary haemorrhage                                                                                                                                                                                                                                                                                                                                                                                                              | Paediatric (off-label use in those <1 year)         | 0–27 days; 28 days to 23 months                                          |  |
| 8–11 Jan 2018 | Hydrochlorothiazide | ALISKIREN\HYDROCHLOROTHIAZIDE<br>AMILORIDE\HYDROCHLOROTHIAZIDE<br>AMLODIPINE\HYDROCHLOROTHIAZIDE<br>VALSARTAN<br>BISOPROLOL\HYDROCHLOROTHIAZIDE | Skin cancer                       | Basal cell carcinoma<br>Carcinoma in situ of skin<br>Malignant melanoma<br>Malignant melanoma in situ<br>Malignant melanoma stage I<br>Malignant melanoma stage IV<br>Metastatic malignant melanoma                                                                                                                                                                                                                                                                  | Adult                                               | 18–44; 45–64 years                                                       |  |

|               |              |                                                                                                                                                                                                                                                                                                                                                 |                 |                                                                                                                                                                                                                     |                              |                                          |
|---------------|--------------|-------------------------------------------------------------------------------------------------------------------------------------------------------------------------------------------------------------------------------------------------------------------------------------------------------------------------------------------------|-----------------|---------------------------------------------------------------------------------------------------------------------------------------------------------------------------------------------------------------------|------------------------------|------------------------------------------|
|               |              | CANDESARTAN<br>CILEXETIL\HYDROCHLOROTHIAZIDE<br>ENALAPRIL\HYDROCHLOROTHIAZIDE<br>HYDROCHLOROTHIAZIDE<br>HYDROCHLOROTHIAZIDE\IRBESARTAN<br>HYDROCHLOROTHIAZIDE\LISINOPRIL<br>HYDROCHLOROTHIAZIDE\LOSARTAN<br>HYDROCHLOROTHIAZIDE\RAMIPRIL<br>HYDROCHLOROTHIAZIDE\TELMISARTAN<br>HYDROCHLOROTHIAZIDE\TRIAMTERENE<br>HYDROCHLOROTHIAZIDE\VALSARTAN |                 | Skin squamous cell carcinoma metastatic<br>Squamous cell carcinoma of skin<br>Superficial spreading melanoma stage I<br>Superficial spreading melanoma stage IV<br>Superficial spreading melanoma stage unspecified |                              |                                          |
| 9–12 Feb 2015 | Teriparatide | TERIPARATIDE                                                                                                                                                                                                                                                                                                                                    | Angina pectoris | Angina pectoris<br>Chest discomfort<br>Chest pain                                                                                                                                                                   | Women postmenopausal,<br>Men | Female; 45–64; 65–74;<br>75+ years; male |

Please note that the drugs, events and subgroups combinations not represented in FAERS were removed. The 1719 PRAC subgroup DEC's available in FAERS are not individually represented in the table because of space limitations and do not correspond to the Cartesian product of the drugs, events and subgroups in the table.

<sup>a</sup>Algorithm slightly adapted given that free-text fields were not available in the version of FAERS used for this analysis (see Methods section 2.2.2 for details)

<sup>b</sup>Underlying condition of no relevant impact, representing mostly the drug indication

CAP, centrally authorised product; DEC, drug–event combination; DOAC, direct oral anticoagulant; FAERS, Food and Drug Administration Adverse Event Reporting System; HER2, human epidermal growth factor receptor 2; HLG, High Level Group Term; HRT, hormone replacement therapy; MALT, mucosa-associated lymphoid tissue; MedDRA, Medical Dictionary for Regulatory Activities; NAP, nationally authorised product; NEC not elsewhere classified; PRAC, Pharmacovigilance Risk Assessment Committee; PT, preferred term

**Supplementary Table 2.** Overall subgroup DEC<sub>s</sub> identified in FAERS and PRAC minutes.

| Covariate                         | Subgroups                                    | FAERS reports per subgroup, n (%) | FAERS reports per subgroup in the subset of PRAC examples, n (%) |
|-----------------------------------|----------------------------------------------|-----------------------------------|------------------------------------------------------------------|
| Age                               | 0–27 days                                    | 65,781 (1)                        | 28 (<1)                                                          |
|                                   | 28 days–23 months                            | 25,825 (<1)                       | 5 (<1)                                                           |
|                                   | 2–11 years                                   | 186,021 (2)                       | 12 (<1)                                                          |
|                                   | 12–17 years                                  | 210,288 (3)                       | 1 (<1)                                                           |
|                                   | 18–44 years                                  | 1,677,035 (22)                    | 3,475 (12)                                                       |
|                                   | 45–64 years                                  | 2,779,964 (37)                    | 20,234 (70)                                                      |
|                                   | 65–74 years                                  | 1,436,356 (19)                    | 3,481 (12)                                                       |
|                                   | ≥ 75 years                                   | 1,191,450 (16)                    | 1,503 (5)                                                        |
|                                   | <b>Total with age reported</b>               | <b>7,572,720 (58)</b>             | <b>28,739 (100)</b>                                              |
| Sex                               | Male                                         | 4,486,718 (39)                    | 364 (1)                                                          |
|                                   | Female                                       | 7,130,526 (61)                    | 26,941 (99)                                                      |
|                                   | <b>Total with sex reported</b>               | <b>11,617,244 (89)</b>            | <b>27,305 (100)</b>                                              |
| Underlying condition <sup>a</sup> | 1 all-drugs indication                       | 8,867,127 (77)                    | 12,128 (99)                                                      |
|                                   | 2 all-drugs indications                      | 1,756,354 (15)                    | 78 (1)                                                           |
|                                   | 3 all-drugs indications                      | 424,993 (4)                       | 4 (<1)                                                           |
|                                   | 4 all-drugs indications                      | 187,275 (2)                       | 1 (<1)                                                           |
|                                   | 5 all-drugs indications                      | 99,983 (1)                        | 2 (<1)                                                           |
|                                   | 6 all-drugs indications                      | 59,558 (1)                        | 0                                                                |
|                                   | 7+ all-drugs indications                     | 105,603 (1)                       | 0                                                                |
|                                   | <b>Total with at least 1 drug indication</b> | <b>11,500,893 (88)</b>            | <b>12,213 (100)</b>                                              |
| Pregnancy                         | Pregnant <sup>b</sup>                        | 63,375 (<1)                       | 138 (100)                                                        |

<sup>a</sup>Approximated using all reported drugs indication at MedDRA HLGT – 1 all-drugs indication means that only 1 drug indication was reported in the cases, 2 all-drugs indication means that 2 drug indications were reported in the cases, etc.

<sup>b</sup>Algorithm slightly adapted given that free-text fields were not available in the version of FAERS used for this analysis (see Methods section 2.2.2.3 for details)

DEC, drug–event combination; FAERS, Food and Drug Administration Adverse Event Reporting System; PRAC, Pharmacovigilance Risk Assessment Committee



## References

1. Sandberg L, Taavola H, Aoki Y, Chandler R, Norén GN. Risk factor considerations in statistical signal detection: using subgroup disproportionality to uncover risk groups for adverse drug reactions in VigiBase. *Drug Saf.* 2020;43:999-1009. <https://doi.org/10.1007/s40264-020-00957-w>.
